# Supplementary material for: γ-Catenin is overexpressed in acute myeloid leukemia and promotes the stabilization and nuclear localization of β-catenin
Source: PubMed Central journal article supplement — Leukemia. 2012 Aug 24;27(2):336–43. doi: 10.1038/leu.2012.221 (PMC3613703; doi:10.1038/leu.2012.221), 2012-08-24
Supplement: leu2012221x1.pdf [file leu2012221x1.pdf]

## Supplementary material

### Supplementary methods

#### Assessment of catenin mRNA expression using qRT-PCR

Patient RNA was isolated from the blasts of primary AML samples (n=19) or leukemic cell lines as previously described.<sup>1</sup> RNA samples were prepared for, and analysed by, qRT-PCR also as previously described<sup>2</sup> using the following primers (Eurofins MWG Operon, Ebersberg, Germany) for *γ-catenin*: forward; 5'-ACTGAACTCCACCGACCAAC-3' and reverse; 5'-GTCGAAGAGAGAGGGTCCCAC-3', and for the housekeeping gene *ABL*: forward; 5'-CCCAACCTTTTCGTTGCACTGT-3' and reverse 5'-AGATGCAGAGGAGGCTCTCGGC-3'. Normalized expression values were determined by crossing-point analysis of *γ-catenin* or *β-catenin* signal compared with the *ABL* housekeeping gene control in duplicate samples. Normalized *γ-catenin* and *β-catenin* qRT-PCR values were compared to the corresponding, microarray values for the patient,<sup>1</sup> and the degree of correlation between the two techniques assessed using Pearson's correlation coefficient (R).

## Supplementary material

**Supplemental Table S1. AML patient clinical and demographic data.** Cohort 1 contains clinical characteristics of the patients used in whole cell Western blotting and cohort 2 the patients (for which there is clinical data available) included in nuclear/cytosolic Western blotting.

| Parameter                                                  | Patient cohort 1 (n=44) | Patient cohort 2 (n=49) |
|------------------------------------------------------------|-------------------------|-------------------------|
| <b>Age</b>                                                 |                         |                         |
| <15                                                        | 0                       | 0                       |
| 15-29                                                      | 2                       | 8                       |
| 30-39                                                      | 7                       | 5                       |
| 40-49                                                      | 12                      | 5                       |
| 50-59                                                      | 15                      | 18                      |
| 60-69                                                      | 5                       | 7                       |
| 70+                                                        | 3                       | 6                       |
| Median (range)                                             | 53 (23-77)              | 55 (17-78)              |
| <b>Sex</b>                                                 |                         |                         |
| Female                                                     | 20                      | 27                      |
| Male                                                       | 24                      | 22                      |
| <b>WHO performance status</b>                              |                         |                         |
| 0                                                          | 20                      | 27                      |
| 1                                                          | 17                      | 20                      |
| 2                                                          | 3                       | 2                       |
| 3                                                          | 4                       | 0                       |
| 4                                                          | 0                       | 0                       |
| <b>White blood cell count (<math>\times 10^9/L</math>)</b> |                         |                         |
| <10                                                        | 9                       | 6                       |
| 10-49.9                                                    | 15                      | 16                      |
| 50-99.9                                                    | 9                       | 16                      |
| 100+                                                       | 11                      | 11                      |
| Unknown                                                    | 0                       | 0                       |
| Median (range)                                             | 34.3 (1.2-188.0)        | 64.1 (3.8-257.0)        |
| <b>Cytogenetics</b>                                        |                         |                         |
| Favourable                                                 | 7                       | 4                       |
| Intermediate                                               | 23                      | 31                      |
| Adverse                                                    | 3                       | 6                       |
| Unknown                                                    | 11                      | 8                       |
| <b>Secondary Disease</b>                                   |                         |                         |
| No                                                         | 38                      | 46                      |
| Yes                                                        | 6                       | 3                       |
| <b>FAB Type</b>                                            |                         |                         |
| M0                                                         | 3                       | 6                       |
| M1                                                         | 14                      | 19                      |
| M2                                                         | 6                       | 10                      |
| M3                                                         | 0                       | 0                       |
| M4                                                         | 10                      | 8                       |
| M5                                                         | 3                       | 4                       |
| M6                                                         | 1                       | 0                       |
| M7                                                         | 0                       | 0                       |
| ALL                                                        | 0                       | 0                       |
| Bilineage                                                  | 0                       | 0                       |
| RAEB/RAEB-t                                                | 0                       | 0                       |
| Unknown/Other                                              | 7                       | 2                       |

## Supplementary material

**Supplemental Table S2. AML patient clinical and demographic data.** Specific clinical characteristics of the patient samples presented in Western blot Figure 1A.

| Lane number<br>(left to right on blot) | Age | Sex | WHO performance status | WBC Count (x10 <sup>9</sup> /L) | Cytogenetic status | Secondary disease (Y/N) | FAB type |
|----------------------------------------|-----|-----|------------------------|---------------------------------|--------------------|-------------------------|----------|
| 1                                      | 55  | M   | 3                      | 48.4                            | Intermediate       | N                       | M2       |
| 2                                      | 48  | F   | 0                      | 50                              | Intermediate       | N                       | M2       |
| 3                                      | 54  | F   | 0                      | 7.6                             | Intermediate       | N                       | U        |
| 4                                      | 56  | F   | 0                      | 25                              | U                  | Y                       | M4       |
| 5                                      | 59  | F   | 0                      | 124.9                           | Favourable t(8;21) | N                       | M2       |
| 6                                      | 42  | F   | 1                      | 58                              | Favourable         | N                       | M1       |
| 7                                      | 42  | F   | 1                      | 184                             | U                  | N                       | M1       |
| 8                                      | 64  | M   | 0                      | 61.4                            | Intermediate       | N                       | M1       |
| 9                                      | 35  | M   | 0                      | 10.7                            | Favourable         | N                       | M2       |
| 10                                     | 57  | M   | 2                      | 183.7                           | Intermediate       | N                       | U        |
| 11                                     | 61  | F   | 1                      | 7.4                             | Adverse            | Y                       | M0       |
| 12                                     | 55  | M   | 1                      | 188                             | U                  | N                       | M0       |

U=Unknown

## Supplementary material

**Supplemental Table S3. AML patient clinical and demographic data.** Specific clinical characteristics of the patient samples presented in Western blot Figure 2A.

| Lane number<br>(left to right on blot) | Age | Sex | WHO performance status | WBC Count (x10 <sup>9</sup> /L) | Cytogenetic status | Secondary disease (Y/N) | FAB type |
|----------------------------------------|-----|-----|------------------------|---------------------------------|--------------------|-------------------------|----------|
| 1                                      | 32  | M   | 0                      | 257                             | Intermediate       | N                       | M0       |
| 2                                      | 59  | F   | 1                      | 29.4                            | Intermediate       | N                       | M0       |
| 3                                      | 24  | F   | 0                      | 25.8                            | Intermediate       | N                       | M2       |
| 4                                      | 71  | M   | 1                      | 8.8                             | Adverse            | N                       | M2       |
| 5                                      | 58  | F   | 0                      | 2                               | Adverse            | N                       | M1       |
| 6                                      | 63  | M   | 0                      | 68.2                            | U                  | N                       | M4       |
| 7                                      | U   | U   | U                      | U                               | U                  | U                       | U        |

U=Unknown

**Supplemental Table S4. AML patient clinical and demographic data.** Specific clinical characteristics of the patient samples used for CLSM image Figure 2B.

| AML patient number | Age | Sex | WHO performance status | WBC Count (x10 <sup>9</sup> /L) | Cytogenetic status | Secondary disease (Y/N) | FAB type |
|--------------------|-----|-----|------------------------|---------------------------------|--------------------|-------------------------|----------|
| 1                  | 74  | F   | U                      | 123                             | Adverse            | N                       | M0       |
| 2                  | 73  | M   | U                      | 120                             | Adverse            | N                       | M0       |

U=Unknown

## Supplementary material

**Supplemental Table S5. AML patient clinical and demographic data.** Specific clinical characteristics of patient samples presented in Western blot Figure 3A.

| Lane number<br>(left to right on blot) | Age | Sex | WHO performance status | WBC Count (x10 <sup>9</sup> /L) | Cytogenetic status | Secondary disease (Y/N) | FAB type |
|----------------------------------------|-----|-----|------------------------|---------------------------------|--------------------|-------------------------|----------|
| 1                                      | 17  | M   | 0                      | 75                              | Intermediate       | N                       | M1       |
| 2                                      | 17  | M   | 0                      | 29                              | Intermediate       | N                       | M1       |
| 3                                      | 28  | F   | 0                      | 74                              | Favourable inv(16) | Y                       | M1       |
| 4                                      | 35  | M   | 0                      | 55.5                            | Adverse            | N                       | M1       |
| 5                                      | 53  | F   | 0                      | 113.4                           | Intermediate       | N                       | M1       |
| 6                                      | 28  | F   | 0                      | 28                              | Adverse            | N                       | M0       |
| 7                                      | 68  | M   | 1                      | 193                             | Intermediate       | N                       | M1       |
| 8                                      | U   | U   | U                      | U                               | U                  | U                       | M4       |

U=Unknown

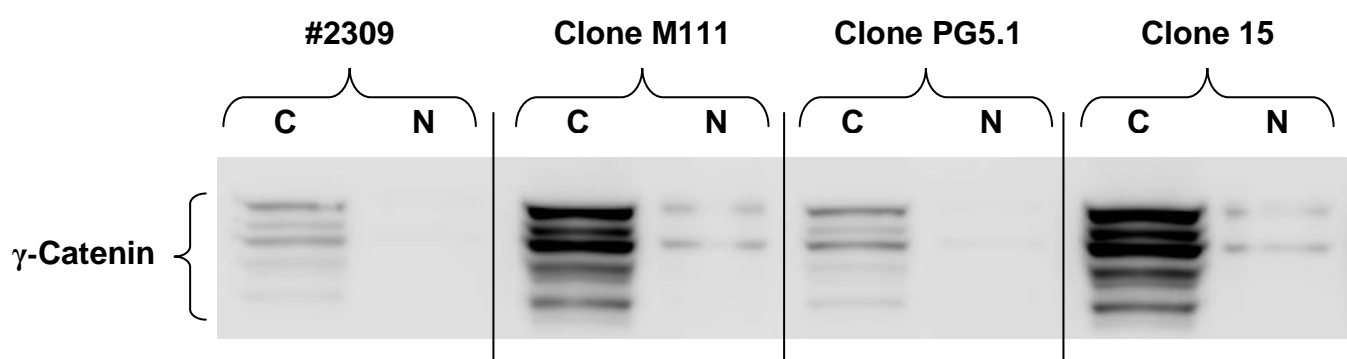

**Supplemental Figure S1. The multiple banding observed during  $\gamma$ -catenin detection is not due to non-specific binding by antibodies.** Cytosolic and nuclear fractions of K562 cells were separately probed with the following  $\gamma$ -catenin antibodies: #2309 (polyclonal, Cell signalling), clone M111 (monoclonal, Abcam), clone PG 5.1 (monoclonal, AbD Serotec) and Clone 15 (monoclonal, BD). All antibodies produced the same pattern of  $\gamma$ -catenin protein bands (albeit to varying intensities).

## Supplementary material

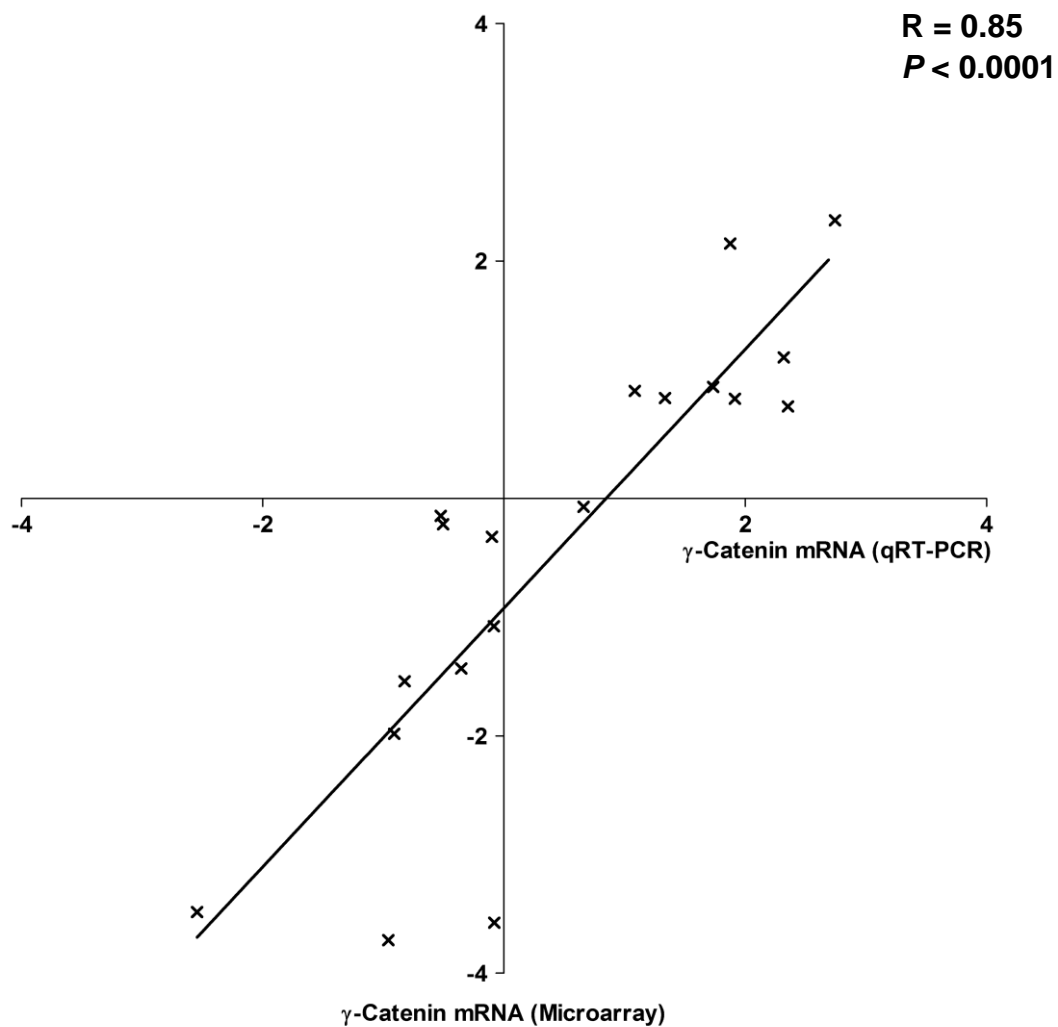

### Supplemental Figure S2. Validation of $\gamma$ -catenin mRNA expression values by qRT-PCR.

Patient RNA was isolated from the blasts of primary AML samples (n=19) and the measurement of  $\gamma$ -catenin transcript validated by both microarray and qRT-PCR. The degree of correlation between the two techniques is shown on the graph above.

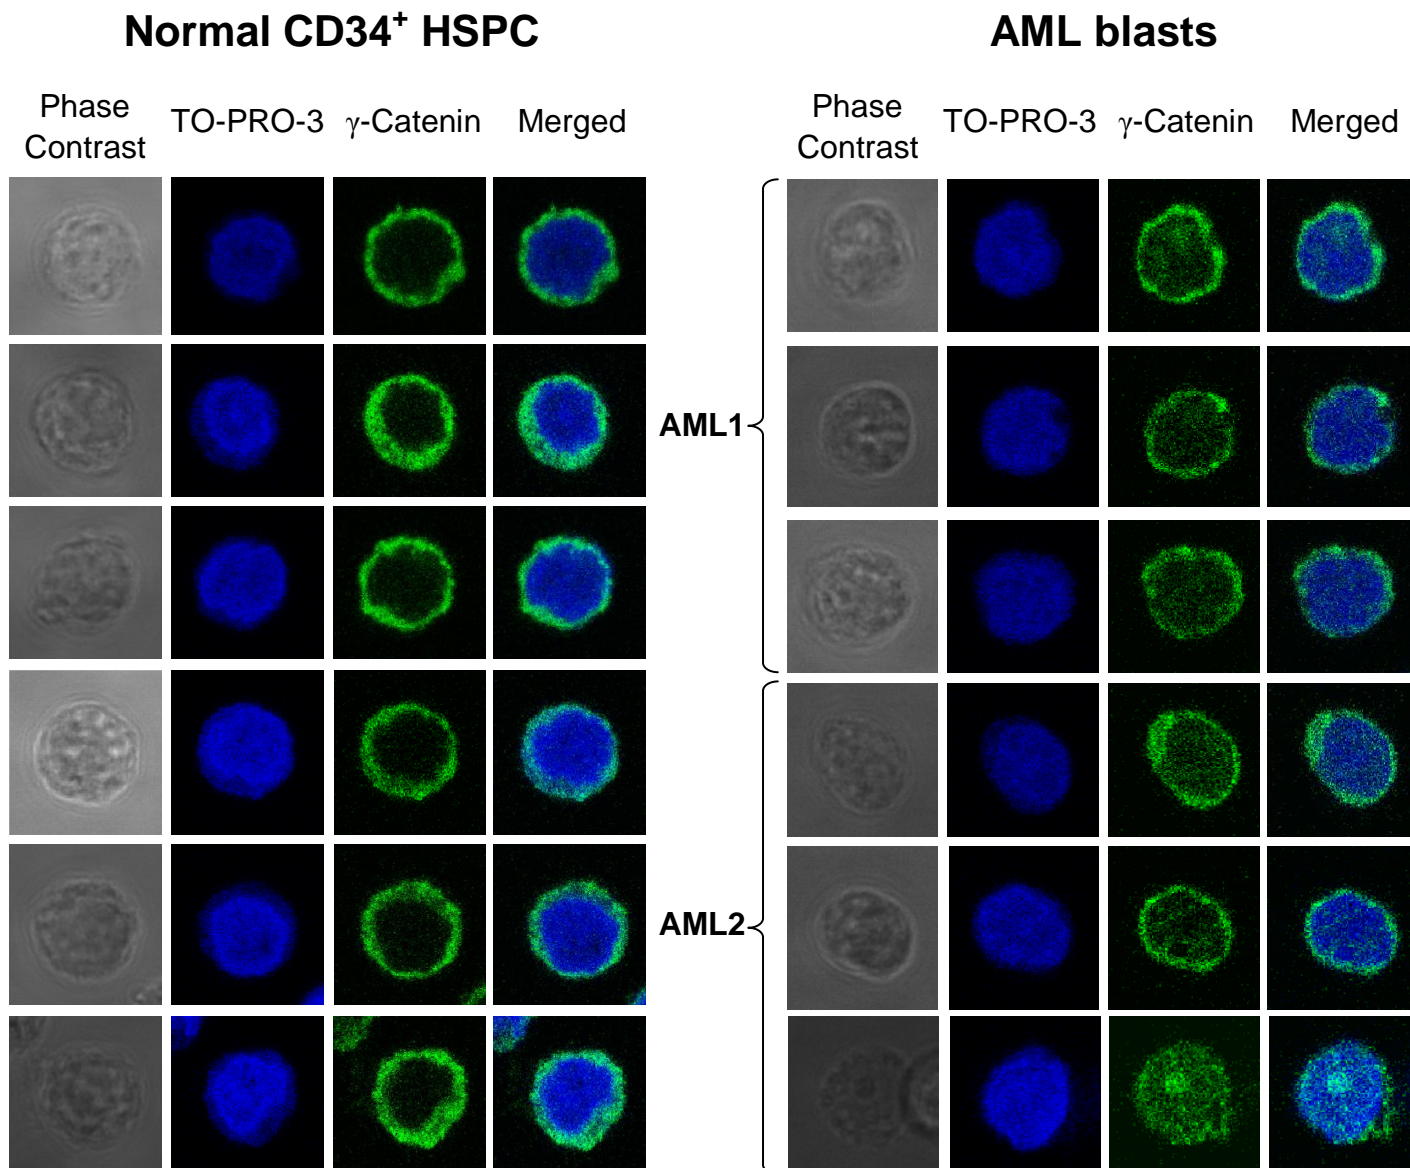

**Supplemental Figure S3.  $\gamma$ -Catenin subcellular localisation is dysregulated in AML blasts.** AML blasts or normal CD34<sup>+</sup> HSPC were fixed, permeabilised, immunolabelled with  $\gamma$ -catenin antibody and analysed by CLSM as described in Methods. Phase contrast, TO-PRO-3 (DNA stain),  $\gamma$ -catenin and merged images are shown. Primary AML blasts (n=5, six Z-sections shown from 2 AML patients, AML1 and AML2) demonstrated significantly ( $P<0.05$ ) more nuclear  $\gamma$ -catenin staining than their normal CD34<sup>+</sup> HSPC counterparts (n=3, six Z-sections shown from one CD34<sup>+</sup> HSPC preparation).



## Supplementary material

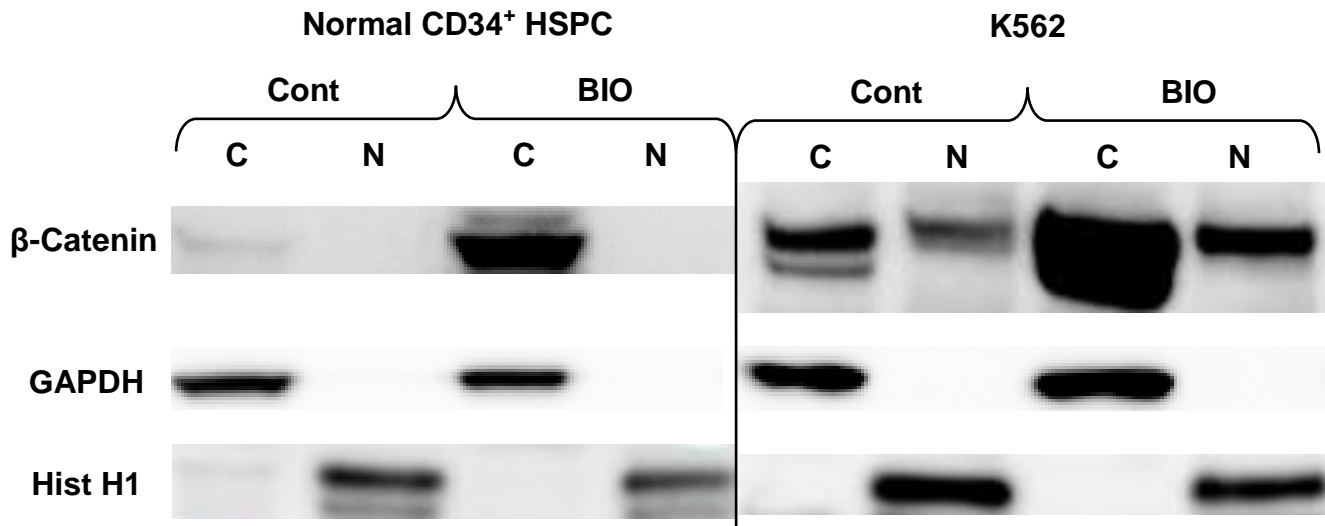

**Supplemental Figure S4. Sensitivity of  $\beta$ -catenin protein level to the GSK inhibitor, BIO, in hematopoietic cells.** Cytosolic (C) and nuclear (N) expression of  $\beta$ -catenin hematopoietic cells treated with the GSK inhibitor BIO (which inhibits the destruction complex) for 16 hours. GAPDH and Histone indicate the purity/relative loading of each fraction. The extensive stabilization of  $\beta$ -catenin following BIO treatment demonstrates that  $\beta$ -catenin is rapidly degraded in both normal and leukemic cells, however only in leukemic cells does  $\beta$ -catenin stabilization result in its translocation.

## References

1. Tonks A, Pearn L, Musson M, et al. Transcriptional dysregulation mediated by RUNX1-RUNX1T1 in normal human progenitor cells and in acute myeloid leukaemia. *Leukemia*. 2007;21(12):2495-2505.
2. Liddiard K, Hills R, Burnett AK, Darley RL, Tonks A. OGG1 is a novel prognostic indicator in acute myeloid leukaemia. *Oncogene*. 2010;29(13):2005-2012.
